# Supplementary material for: IMC29 Plays an Important Role in Toxoplasma Endodyogeny and Reveals New Components of the Daughter-Enriched IMC Proteome
Source: PubMed Central journal article supplement (PMC9973257; doi:10.1128/mbio.03042-22), 2023-01-09
Supplement: mbio.03042-22-s0008.pdf [file mbio.03042-22-s0008.pdf]

**Table S1. List of top hits identified by mass spectrometry of IMC29-BioID whole cell lysates.** Proteins were ranked by NSAF. Proteins present in the RH-Control were not excluded but only included in this list if the ratio of IMC29:RH > 2. Gene IDs and descriptions are from ToxoDB. Hypothetical proteins localized by endogenous tagging in this study are highlighted in blue. Parentheses indicate references specific to supplemental information.

| Gene ID      | Rank | IMC29 (NSAF <sup>5</sup> ) | RH-Control (NSAF <sup>5</sup> ) | Description                                                 |
|--------------|------|----------------------------|---------------------------------|-------------------------------------------------------------|
| TGGT1_231640 | 1    | 1183.31015                 | 12.596938                       | IMC1 (1)                                                    |
| TGGT1_235340 | 2    | 885.5741                   | 0                               | ISC1 (2)                                                    |
| TGGT1_231630 | 3    | 815.5314                   | 0                               | IMC4 (3)                                                    |
| TGGT1_243200 | 4    | 683.71524                  | 0                               | IMC29 (bait)                                                |
| TGGT1_278975 | 5    | 417.5837                   | 0                               | ICE family protease (caspase) p20 domain-containing protein |
| TGGT1_226220 | 6    | 364.59644                  | 0                               | IMC9 (4)                                                    |
| TGGT1_230210 | 7    | 320.22991                  | 0                               | IMC10 (4)                                                   |
| TGGT1_294610 | 8    | 319.2808                   | 0                               | IMC30 (this study)                                          |
| TGGT1_232340 | 9    | 297.48487                  | 21.037116                       | PPM2A (2)                                                   |
| TGGT1_298610 | 10   | 267.8377                   | 0                               | GYF domain-containing protein                               |
| TGGT1_294860 | 11   | 264.91531                  | 0                               | BCC0 (5 & this study)                                       |
| TGGT1_258410 | 12   | 241.52019                  | 0                               | PHIL1 (6)                                                   |
| TGGT1_293730 | 13   | 239.40594                  | 43.4536                         | DHHC14 (7)                                                  |
| TGGT1_212770 | 14   | 236.70264                  | 0                               | IMC34 (8)                                                   |
| TGGT1_216000 | 15   | 203.6985                   | 0                               | IMC3 (9)                                                    |
| TGGT1_255450 | 16   | 180.6571                   | 0                               | IMC31 (this study)                                          |
| TGGT1_313380 | 17   | 169.68115                  | 27.9983                         | ILP1 (10)                                                   |
| TGGT1_217890 | 18   | 169.43382                  | 78.28097                        | Putative alkyl hydroperoxide reductase                      |
| TGGT1_320080 | 19   | 168.72487                  | 0                               | Hypothetical protein                                        |
| TGGT1_235690 | 20   | 167.44047                  | 0                               | IMC37 (this study)                                          |
| TGGT1_282070 | 21   | 161.51147                  | 161.51147                       | IMC33 (8)                                                   |
| TGGT1_249180 | 22   | 152.43487                  | 62.88143                        | Bifunctional dihydrofolate reductase-thymidylate synthase   |
| TGGT1_231070 | 23   | 151.17918                  | 0                               | BCC2 (5)                                                    |
| TGGT1_280370 | 24   | 148.37147                  | 35.283013                       | Hypothetical protein                                        |
| TGGT1_211680 | 25   | 148.06573                  | 32.575522                       | Protein disulfide isomerase                                 |
| TGGT1_321620 | 26   | 139.01453                  | 0                               | Dynamin-related protein DRPB                                |
| TGGT1_203010 | 27   | 136.99314                  | 0                               | Aurora Kinase (11)                                          |
| TGGT1_220270 | 28   | 134.63118                  | 0                               | IMC6 (4)                                                    |
| TGGT1_268200 | 29   | 133.24609                  | 65.11333                        | RNA recognition motif-containing protein                    |
| TGGT1_204160 | 30   | 131.20985                  | 0                               | GYF domain-containing protein                               |
| TGGT1_290920 | 31   | 123.63236                  | 0                               | Oxidoreductase, 2OG-Fe(II) oxygenase family protein         |
| TGGT1_305190 | 32   | 119.02878                  | 0                               | CorA family Mg <sup>2+</sup> transporter protein            |
| TGGT1_292950 | 33   | 115.7869                   | 0                               | AC10 (12)                                                   |
| TGGT1_225960 | 34   | 114.97692                  | 0                               | STE kinase                                                  |
| TGGT1_304670 | 35   | 108.07671                  | 22.696849                       | IMC23 (2)                                                   |
| TGGT1_239800 | 36   | 107.47258                  | 24.826976                       | TSC2 (13)                                                   |
| TGGT1_230940 | 37   | 106.84454                  | 15.111362                       | Hypothetical protein                                        |
| TGGT1_243960 | 38   | 95.835334                  | 33.689302                       | Nuclear transport factor 2 (ntf2) domain-containing protein |
| TGGT1_228150 | 39   | 94.21                      | 0                               | Hypothetical protein                                        |
| TGGT1_209950 | 40   | 93.98781                   | 0                               | Putative thioredoxin                                        |
| TGGT1_275670 | 41   | 91.18085                   | 0                               | IMC15 (4)                                                   |
| TGGT1_238895 | 42   | 90.35104                   | 0                               | Hypothetical protein                                        |
| TGGT1_249870 | 43   | 87.1628                    | 0                               | Localizes to the cytoplasm (2)                              |
| TGGT1_260580 | 44   | 87.001285                  | 0                               | Hypothetical protein                                        |
| TGGT1_311400 | 45   | 85.90348                   | 0                               | WD domain, G-beta repeat-containing protein                 |
| TGGT1_295350 | 46   | 85.70071                   | 0                               | Putative nucleoside diphosphate kinase                      |
| TGGT1_306220 | 47   | 83.637546                  | 0                               | Hypothetical protein                                        |
| TGGT1_312270 | 48   | 83.022565                  | 38.357673                       | ROP13 (14)                                                  |
| TGGT1_246950 | 49   | 80.818427                  | 0                               | AC9 (13)                                                    |
| TGGT1_291180 | 50   | 80.65225                   | 19.911287                       | Vacuolar protein sorting 13 (VPS13)                         |
| TGGT1_293690 | 51   | 80.50673                   | 0                               | Profilin PRF                                                |
| TGGT1_231850 | 52   | 80.26351                   | 0                               | PP2C                                                        |
| TGGT1_312590 | 53   | 78.801083                  | 0                               | CLASP family microtubule associated protein                 |
| TGGT1_253470 | 54   | 75.09579                   | 0                               | IMC13 (4)                                                   |
| TGGT1_240630 | 55   | 73.05986                   | 0                               | IMC35 (this study)                                          |
| TGGT1_214575 | 56   | 72.193536                  | 0                               | Hypothetical protein                                        |
| TGGT1_223000 | 57   | 72.193536                  | 0                               | Dynein light chain DLC                                      |
| TGGT1_230160 | 58   | 70.15991                   | 0                               | Localizes to the IMC (15)                                   |
| TGGT1_245470 | 59   | 70.01903                   | 0                               | Mitotic checkpoint protein, BUB3 family protein             |
| TGGT1_231440 | 60   | 67.55117                   | 0                               | LsmAD domain-containing protein                             |
| TGGT1_297720 | 61   | 65.22231                   | 28.250332                       | trehalose-phosphatase                                       |
| TGGT1_272660 | 62   | 64.358575                  | 0                               | Localizes to the endoplasmic reticulum (15)                 |

|              |     |           |           |                                                                       |
|--------------|-----|-----------|-----------|-----------------------------------------------------------------------|
| TGGT1_311770 | 63  | 62.386895 | 0         | BCC3 (5 & this study)                                                 |
| TGGT1_251810 | 64  | 61.880174 | 0         | Putative translation initiation factor eIF-5A                         |
| TGGT1_263090 | 65  | 61.68859  | 23.750881 | 14-3-3 protein (Weidner et al. 2016)                                  |
| TGGT1_210345 | 66  | 61.4982   | 0         | Hypothetical protein                                                  |
| TGGT1_260600 | 67  | 61.42481  | 25.175084 | PUF1                                                                  |
| TGGT1_229930 | 68  | 61.12091  | 0         | p25-alpha family protein                                              |
| TGGT1_214880 | 69  | 60.639466 | 0         | AC4 (2)                                                               |
| TGGT1_243430 | 70  | 59.51439  | 5.499308  | OTU family cysteine protease                                          |
| TGGT1_255880 | 71  | 59.07578  | 0         | Co-localizes with MORN1 (16)                                          |
| TGGT1_249440 | 72  | 59.03827  | 0         | AC12 (this study)                                                     |
| TGGT1_259660 | 73  | 58.673194 | 0         | orotate phosphoribosyltransferase                                     |
| TGGT1_258470 | 74  | 58.4666   | 0         | IMC24 (2)                                                             |
| TGGT1_308860 | 75  | 55.85616  | 17.595263 | AC3 (2)                                                               |
| TGGT1_313270 | 76  | 55.76364  | 0         | Hypothetical protein                                                  |
| TGGT1_207690 | 77  | 54.441026 | 0         | Programmed cell death 5 protein                                       |
| TGGT1_310700 | 78  | 54.26312  | 0         | Serine/threonine phosphatase PP1                                      |
| TGGT1_285650 | 79  | 52.82921  | 0         | Hypothetical protein                                                  |
| TGGT1_260540 | 80  | 49.836194 | 0         | IMC14 (4)                                                             |
| TGGT1_227600 | 81  | 49.56571  | 0         | RPL34                                                                 |
| TGGT1_309210 | 82  | 49.56571  | 0         | Putative peroxiredoxin 6                                              |
| TGGT1_315700 | 83  | 48.304038 | 0         | Hypothetical protein                                                  |
| TGGT1_291140 | 84  | 47.959952 | 19.4633   | CCR4-Not complex component, Not1 protein                              |
| TGGT1_263520 | 85  | 47.306306 | 0         | SPM1 (17)                                                             |
| TGGT1_311230 | 86  | 46.173748 | 2.499957  | BCC7 (3)                                                              |
| TGGT1_310440 | 87  | 45.742458 | 0         | MORN1 (18)                                                            |
| TGGT1_297870 | 88  | 45.700496 | 0         | IMC36 (this study)                                                    |
| TGGT1_297120 | 89  | 43.696087 | 0         | Hypothetical protein                                                  |
| TGGT1_237290 | 90  | 43.004492 | 3.6793932 | Hypothetical protein                                                  |
| TGGT1_247350 | 91  | 42.575676 | 0         | Thioredoxin domain-containing protein                                 |
| TGGT1_271930 | 92  | 42.575676 | 0         | IMC20 (2)                                                             |
| TGGT1_267060 | 93  | 42.304493 | 0         | RPL14                                                                 |
| TGGT1_250790 | 94  | 42.036743 | 0         | Hypothetical protein                                                  |
| TGGT1_230850 | 95  | 41.860118 | 0         | TSC3 (13)                                                             |
| TGGT1_231140 | 96  | 41.25345  | 0         | RPS25                                                                 |
| TGGT1_207370 | 97  | 41.11824  | 0         | Hypothetical protein                                                  |
| TGGT1_214260 | 98  | 40.664113 | 13.419594 | Putative alpha-glucan water dikinase 1                                |
| TGGT1_239830 | 99  | 40.549968 | 0         | TBC domain-containing protein                                         |
| TGGT1_205320 | 100 | 40.44401  | 15.571452 | Hypothetical protein                                                  |
| TGGT1_223790 | 101 | 39.731638 | 0         | Cytoplasmic localization (19)                                         |
| TGGT1_250700 | 102 | 39.613154 | 17.793487 | Hypothetical protein                                                  |
| TGGT1_242290 | 103 | 39.378292 | 0         | Putative proteasome subunit alpha1                                    |
| TGGT1_250340 | 104 | 39.069445 | 0         | Centrin 2 (20, 21)                                                    |
| TGGT1_275350 | 105 | 38.737993 | 0         | TBC domain-containing protein                                         |
| TGGT1_301410 | 106 | 38.577768 | 0         | Hypothetical protein                                                  |
| TGGT1_236040 | 107 | 38.347606 | 0         | Fructose-1,6-bisphosphate aldolase                                    |
| TGGT1_220090 | 108 | 38.025604 | 0         | Hypothetical protein                                                  |
| TGGT1_301420 | 109 | 37.88102  | 0         | SAS6L (22)                                                            |
| TGGT1_236560 | 110 | 37.509188 | 0         | Hypothetical protein                                                  |
| TGGT1_313080 | 111 | 36.493436 | 0         | Hypothetical protein                                                  |
| TGGT1_309590 | 112 | 36.413406 | 0         | ROP1 (23)                                                             |
| TGGT1_238170 | 113 | 36.259054 | 0         | IAP3 (this study)                                                     |
| TGGT1_309870 | 114 | 36.009788 | 0         | Localizes to the VAC (24)                                             |
| TGGT1_268850 | 115 | 34.95687  | 0         | Enolase 2                                                             |
| TGGT1_293180 | 116 | 34.47304  | 0         | NADP-specific glutamate dehydrogenase                                 |
| TGGT1_310870 | 117 | 33.043805 | 0         | TMCO1 ortholog                                                        |
| TGGT1_283850 | 118 | 33.010961 | 0         | Peptidyl-prolyl cis-trans isomerase                                   |
| TGGT1_291930 | 119 | 32.9735   | 0         | RNA recognition motif-containing protein                              |
| TGGT1_262640 | 120 | 32.55787  | 0         | Cg8 family protein                                                    |
| TGGT1_322000 | 121 | 32.55787  | 0         | Myosin-light-chain kinase                                             |
| TGGT1_248640 | 122 | 32.058684 | 0         | Regulator of chromosome condensation (RCC1) repeat-containing protein |
| TGGT1_214180 | 123 | 31.428103 | 0         | ENTH domain-containing protein                                        |
| TGGT1_311240 | 124 | 31.182184 | 0         | Putative DnaJ family chaperone                                        |
| TGGT1_316680 | 125 | 31.058802 | 2.759545  | RNA pseudouridine synthase superfamily protein                        |
| TGGT1_248460 | 126 | 30.7491   | 0         | Putative ubiquitin                                                    |
| TGGT1_271060 | 127 | 30.7491   | 0         | Sec1 family protein                                                   |
| TGGT1_200460 | 128 | 30.466996 | 0         | Hypothetical protein                                                  |
| TGGT1_297500 | 129 | 30.411198 | 0         | T-complex protein 1 eta subunit                                       |
| TGGT1_257960 | 130 | 30.258796 | 0         | GDP-D-mannose pyrophosphorylase                                       |

|              |     |           |             |                                                       |
|--------------|-----|-----------|-------------|-------------------------------------------------------|
| TGGT1_216900 | 131 | 29.985578 | 0           | Cytokine induced apoptosis inhibitor 1 family protein |
| TGGT1_289050 | 132 | 28.757384 | 0           | Putative FIKK kinase                                  |
| TGGT1_262150 | 133 | 28.418482 | 0           | Localizes to the cytoplasm (25)                       |
| TGGT1_237210 | 134 | 28.41414  | 0           | Tyrosine kinase-like (TKL) protein                    |
| TGGT1_221690 | 135 | 28.263    | 10.881609   | Hypothetical protein                                  |
| TGGT1_246740 | 136 | 28.09562  | 0           | Hypothetical protein                                  |
| TGGT1_244500 | 137 | 27.953726 | 0           | Tubulin-tyrosine ligase family protein                |
| TGGT1_286590 | 138 | 27.906746 | 0           | SPM2 (17)                                             |
| TGGT1_305610 | 139 | 27.616654 | 0           | Hypothetical protein                                  |
| TGGT1_300260 | 140 | 27.543033 | 9.0894966   | Threonyl-tRNA synthetase family protein               |
| TGGT1_202760 | 141 | 27.370077 | 0           | Hypothetical protein                                  |
| TGGT1_309370 | 142 | 26.959355 | 11.3232985  | Adaptin N-terminal region domain-containing protein   |
| TGGT1_321680 | 143 | 26.781473 | 0           | Hypothetical protein                                  |
| TGGT1_209420 | 144 | 26.567222 | 0           | Hypothetical protein                                  |
| TGGT1_272350 | 145 | 26.567222 | 0           | mRNA export protein (26)                              |
| TGGT1_207060 | 146 | 25.480072 | 0           | RNR2 (27)                                             |
| TGGT1_201380 | 147 | 24.782855 | 0           | Putative chorismate synthase                          |
| TGGT1_258540 | 148 | 24.101279 | 0           | Phosphoglycerate mutase family protein                |
| TGGT1_227952 | 149 | 23.608311 | 0           | 14-3-3 superfamily protein                            |
| TGGT1_203540 | 150 | 23.5734   | 0.433139089 | Putative RNA binding protein                          |

#### References for Table S1.

- Mann T, Beckers C. 2001. Characterization of the subpellicular network, a filamentous membrane skeletal component in the parasite *Toxoplasma gondii*. *Mol Biochem Parasitol* 115:257–268.
- Chen AL, Kim EW, Toh JY, Vashisht AA, Rashoff AQ, Van C, Huang AS, Moon AS, Bell HN, Bentolilla LA, Wohlschlegel JA, Bradley PJ. 2015. Novel Components of the *Toxoplasma* Inner Membrane Complex Revealed by BioID. *mBio* 6.
- Hu K, Johnson J, Florens L, Fraunholz M, Suravajjala S, DiLullo C, Yates J, Roos DS, Murray JM. 2006. Cytoskeletal Components of an Invasion Machine—The Apical Complex of *Toxoplasma gondii*. *PLOS Pathogens* 2:e13.
- Anderson-White BR, Ivey FD, Cheng K, Szatanek T, Lorestani A, Beckers CJ, Ferguson DJP, Sahoo N, Gubbels M-J. 2011. A family of intermediate filament-like proteins is sequentially assembled into the cytoskeleton of *Toxoplasma gondii*. *Cellular Microbiology* 13:18–31.
- Engelberg K, Bechtel T, Michaud C, Weerapana E, Gubbels M-J. 2022. Proteomic characterization of the *Toxoplasma gondii* cytokinesis machinery portrays an expanded hierarchy of its assembly and function. 1. *Nat Commun* 13:4644.
- Gilk SD, Raviv Y, Hu K, Murray JM, Beckers CJM, Ward GE. 2006. Identification of PHIL1, a Novel Cytoskeletal Protein of the *Toxoplasma gondii* Pellicle, through Photosensitized Labeling with 5-[125I]iodonaphthalene-1-Azide. *Eukaryotic Cell* 5:1622–1634.
- Beck JR, Fung C, Straub KW, Coppens I, Vashisht AA, Wohlschlegel JA, Bradley PJ. 2013. A *Toxoplasma* Palmitoyl Acyl Transferase and the Palmitoylated Armadillo Repeat Protein TgARO Govern Apical Rhopty Tethering and Reveal a Critical Role for the Rhoptyries in Host Cell Invasion but Not Egress. *PLOS Pathogens* 9:e1003162.
- Dos Santos Pacheco N, Tosetti N, Krishnan A, Haase R, Maco B, Suarez C, Ren B, Soldati-Favre D. 2021. Revisiting the Role of *Toxoplasma gondii* ERK7 in the Maintenance and Stability of the Apical Complex. *mBio* 12:e02057-21.
- Hu K, Johnson J, Florens L, Fraunholz M, Suravajjala S, DiLullo C, Yates J, Roos DS, Murray JM. 2006. Cytoskeletal Components of an Invasion Machine—The Apical Complex of *Toxoplasma gondii*. *PLOS Pathogens* 2:e13.
- Lorestani A, Ivey FD, Thirugnanam S, Busby MA, Marth GT, Cheeseman IM, Gubbels M-J. 2012. Targeted proteomic dissection of *Toxoplasma* cytoskeleton sub-compartments using MORN1. *Cytoskeleton (Hoboken)* 69:1069–1085.
- Berry L, Chen C-T, Reinger L, Carvalho TG, El Hajj H, Morlon-Guyot J, Bordat Y, Lebrun M, Gubbels M-J, Doerig C, Daher W. 2016. The conserved apicomplexan Aurora kinase TgArk3 is involved in endodyogeny, duplication rate and parasite virulence. *Cellular Microbiology* 18:1106–1120.
- Tosetti N, Dos Santos Pacheco N, Bertiaux E, Maco B, Bournonville L, Hamel V, Guichard P, Soldati-Favre D. 2020. Essential function of the alveolin network in the subpellicular microtubules and conoid assembly in *Toxoplasma gondii*. *eLife* 9:e56635.
- Chen AL, Moon AS, Bell HN, Huang AS, Vashisht AA, Toh JY, Lin AH, Nadipuram SM, Kim EW, Choi CP, Wohlschlegel JA, Bradley PJ. 2017. Novel insights into the composition and function of the *Toxoplasma* IMC sutures. *Cellular Microbiology* 19:e12678.
- Bradley PJ, Ward C, Cheng SJ, Alexander DL, Collier S, Coombs GH, Dunn JD, Ferguson DJ, Sanderson SJ, Wastling JM, Boothroyd JC. 2005. Proteomic Analysis of Rhopty Organelles Reveals Many Novel Constituents for Host-Parasite Interactions in *Toxoplasma gondii*. *Journal of Biological Chemistry* 280:34245–34258.
- Lorestani A, Ivey FD, Thirugnanam S, Busby MA, Marth GT, Cheeseman IM, Gubbels M-J. 2012. Targeted proteomic dissection of *Toxoplasma* cytoskeleton sub-compartments using MORN1. *Cytoskeleton (Hoboken)* 69:1069–1085.
- Engelberg K, Ivey FD, Lin A, Kono M, Lorestani A, Faugno-Fusci D, Gilberger T-W, White M, Gubbels M-J. 2016. A MORN1-associated HAD phosphatase in the basal complex is essential for *Toxoplasma gondii* daughter budding. *Cellular Microbiology* 18:1153–1171.
- Tran JQ, Li C, Chyan A, Chung L, Morrissette NS. 2012. SPM1 Stabilizes Subpellicular Microtubules in *Toxoplasma gondii*. *Eukaryotic Cell* 11:206–216.
- Gubbels M-J, Vaishnav S, Boot N, Dubremetz J-F, Striepen B. 2006. A MORN-repeat protein is a dynamic component of the *Toxoplasma gondii* cell division apparatus. *Journal of Cell Science* 119:2236–2245.
- Long S, Anthony B, Drewry LL, Sibley LD. 2017. A conserved ankyrin repeat-containing protein regulates conoid stability, motility and cell invasion in *Toxoplasma gondii*. 1. *Nature Communications* 8:1–14.
- Leung JM, Liu J, Wetzel LA, Hu K. 2019. Centrin2 from the human parasite *Toxoplasma gondii* is required for its invasion and intracellular replication. *Journal of Cell Science* 132:jcs228791.
- Lentini G, Dubois DJ, Maco B, Soldati-Favre D, Frénel K. 2019. The roles of Centrin 2 and Dynein Light Chain 8a in apical secretory organelles discharge of *Toxoplasma gondii*. *Traffic* 20:583–600.
- de Leon JC, Scheumann N, Beatty W, Beck JR, Tran JQ, Yau C, Bradley PJ, Gull K, Wickstead B, Morrissette NS. 2013. A SAS-6-like protein suggests that the *Toxoplasma* conoid complex evolved from flagellar components. *Eukaryot Cell* 12:1009–1019.
- Ossorio PN, Schwartzman JD, Boothroyd JC. 1992. A *Toxoplasma gondii* rhopty protein associated with host cell penetration has unusual charge asymmetry. *Molecular and Biochemical Parasitology* 50:1–15.
- Daher W, Morlon-Guyot J, Sheiner L, Lentini G, Berry L, Tawk L, Dubremetz J-F, Wengelnik K, Striepen B, Lebrun M. 2015. Lipid kinases are essential for apicomplast homeostasis in *Toxoplasma gondii*. *Cellular Microbiology* 17:559–578.

25. Heredero-Bermejo I, Varberg JM, Charvat R, Jacobs K, Garbuz T, Sullivan WJ, Arrizabalaga G. 2019. TgDrpC, an atypical dynamin-related protein in *Toxoplasma gondii*, is associated with vesicular transport factors and parasite division. *Mol Microbiol* 111:46–64.
26. Courjol F, Mouveaux T, Lesage K, Saliou J-M, Werkmeister E, Bonabaud M, Rohmer M, Slomianny C, Lafont F, Gissot M. 2017. Characterization of a nuclear pore protein sheds light on the roles and composition of the *Toxoplasma gondii* nuclear pore complex. *Cell Mol Life Sci* 74:2107–2125.
27. Molina D, Cossio-Pérez R, Rocha-Roa C, Pedraza L, Cortes E, Hernández A, Gómez-Marín JE. 2018. Protein targets of thiazolidinone derivatives in *Toxoplasma gondii* and insights into their binding to ROP18. *BMC Genomics* 19:856.
