# Supplementary material for: IMC29 Plays an Important Role in Toxoplasma Endodyogeny and Reveals New Components of the Daughter-Enriched IMC Proteome
Source: PubMed Central journal article supplement (PMC9973257; doi:10.1128/mbio.03042-22), 2023-01-09
Supplement: mbio.03042-22-s0009.pdf [file mbio.03042-22-s0009.pdf]

**Table S2. List of top hits identified by mass spectrometry of IMC29-BioID cytoskeletal fraction.** Proteins were ranked by NSAF. Proteins present in the RH-Control were not excluded but only included in this list if the ratio of IMC29:RH > 2. Gene IDs and descriptions are from ToxoDB. Hypothetical proteins localized by endogenous tagging in this study are highlighted in blue. Parentheses indicate references specific to supplemental information.

| Gene ID      | Rank | IMC29 (NSAF <sup>5</sup> ) | RH-Control (NSAF <sup>5</sup> ) | Description                                                 |
|--------------|------|----------------------------|---------------------------------|-------------------------------------------------------------|
| TGGT1_231640 | 1    | 8446.595                   | 768.355                         | IMC1 (1)                                                    |
| TGGT1_231630 | 2    | 5046.7                     | 557.437                         | IMC4 (2)                                                    |
| TGGT1_316340 | 3    | 1512.045                   | 0                               | IMC22 (3)                                                   |
| TGGT1_313380 | 4    | 1229.226                   | 328.417                         | ILP1 (4)                                                    |
| TGGT1_295360 | 5    | 1085.372                   | 134.308                         | IMC18 (3)                                                   |
| TGGT1_286580 | 6    | 1074.066                   | 150.762                         | IMC17 (3)                                                   |
| TGGT1_230210 | 7    | 1066.194                   | 192.828                         | IMC10 (5)                                                   |
| TGGT1_243200 | 8    | 1034.423                   | 243.206                         | IMC29 (bait)                                                |
| TGGT1_217510 | 9    | 986.434                    | 0                               | IMC19 (3)                                                   |
| TGGT1_258470 | 10   | 970.317                    | 0                               | IMC24 (3)                                                   |
| TGGT1_216000 | 11   | 967.512                    | 200.713                         | IMC3 (6)                                                    |
| TGGT1_248700 | 12   | 939.569                    | 389.832                         | IMC12 (5)                                                   |
| TGGT1_220270 | 13   | 930.98                     | 81.069                          | IMC6 (5)                                                    |
| TGGT1_259630 | 14   | 861.157                    | 0                               | IMC27 (7)                                                   |
| TGGT1_230850 | 15   | 804.068                    | 340.284                         | TSC3 (7)                                                    |
| TGGT1_222220 | 16   | 678.041                    | 209.758                         | IMC7 (5)                                                    |
| TGGT1_271930 | 17   | 654.25                     | 0                               | IMC20 (3)                                                   |
| TGGT1_294610 | 18   | 622.411                    | 0                               | IMC30 (this study)                                          |
| TGGT1_250820 | 19   | 595.956                    | 217.96                          | AC2 (3)                                                     |
| TGGT1_304670 | 20   | 588.825                    | 0                               | IMC23 (3)                                                   |
| TGGT1_293360 | 21   | 567.017                    | 148.125                         | IMC38 (this study)                                          |
| TGGT1_308860 | 22   | 514.997                    | 247.669                         | AC3 (3)                                                     |
| TGGT1_237820 | 23   | 478.42                     | 0                               | ISP2 (8)                                                    |
| TGGT1_246950 | 24   | 474.187                    | 0                               | AC9 (7)                                                     |
| TGGT1_212770 | 25   | 472.313                    | 0                               | IMC34 (9)                                                   |
| TGGT1_219170 | 26   | 451.754                    | 0                               | ISC2 (3)                                                    |
| TGGT1_239400 | 27   | 447.786                    | 28.454                          | IMC28 (7)                                                   |
| TGGT1_231070 | 28   | 442.55                     | 130.061                         | BCC2 (10)                                                   |
| TGGT1_275670 | 29   | 415.265                    | 0                               | IMC15 (5)                                                   |
| TGGT1_264990 | 30   | 413.769                    | 0                               | Hypothetical protein                                        |
| TGGT1_305930 | 31   | 392.55                     | 0                               | ISC4 (3)                                                    |
| TGGT1_235690 | 32   | 385.953                    | 0                               | IMC37 (this study)                                          |
| TGGT1_290920 | 33   | 379.966                    | 0                               | Oxidoreductase, 2OG-Fe(II) oxygenase family protein         |
| TGGT1_226220 | 34   | 364.511                    | 119.029                         | IMC9 (5)                                                    |
| TGGT1_288720 | 35   | 346.368                    | 0                               | RPL10                                                       |
| TGGT1_239800 | 36   | 341.475                    | 0                               | TSC2 (7)                                                    |
| TGGT1_260500 | 37   | 340.21                     | 0                               | Putative COPI associated protein                            |
| TGGT1_226570 | 38   | 330.42                     | 0                               | Hypothetical protein                                        |
| TGGT1_255450 | 39   | 318.437                    | 57.591                          | IMC31 (this study)                                          |
| TGGT1_292950 | 40   | 310.136                    | 0                               | AC10 (11)                                                   |
| TGGT1_253470 | 41   | 307.728                    | 90.438                          | IMC13 (5)                                                   |
| TGGT1_306190 | 42   | 293.785                    | 0                               | Hypothetical protein                                        |
| TGGT1_278975 | 43   | 293.071                    | 0                               | ICE family protease (caspase) p20 domain-containing protein |
| TGGT1_282070 | 44   | 292.1                      | 40.398                          | IMC33 (9)                                                   |
| TGGT1_314260 | 45   | 287.501                    | 0                               | Hypothetical protein                                        |
| TGGT1_315750 | 46   | 285.269                    | 0                               | IMC26 (3)                                                   |
| TGGT1_289600 | 47   | 281.424                    | 0                               | HSP29                                                       |
| TGGT1_316540 | 48   | 280.051                    | 0                               | ISP3 (8)                                                    |
| TGGT1_261570 | 49   | 277.345                    | 130.415                         | RPL7A                                                       |
| TGGT1_272520 | 50   | 267.247                    | 0                               | TSC4 (7)                                                    |
| TGGT1_222400 | 51   | 262.598                    | 0                               | ISC7 (ToxoDB comment)                                       |
| TGGT1_260820 | 52   | 260.957                    | 0                               | ISP1 (8)                                                    |
| TGGT1_283510 | 53   | 243.781                    | 0                               | IAP1 (12)                                                   |
| TGGT1_312600 | 54   | 235.53                     | 0                               | HSP21                                                       |
| TGGT1_227600 | 55   | 228.499                    | 0                               | RPL34                                                       |
| TGGT1_228470 | 56   | 224.041                    | 0                               | RPL15                                                       |
| TGGT1_293730 | 57   | 220.734                    | 0                               | DHHC14 (13)                                                 |
| TGGT1_255420 | 58   | 220.28                     | 0                               | IMC39 (this study)                                          |
| TGGT1_313190 | 59   | 216.643                    | 0                               | Rab18/RabC-family small GTPase                              |
| TGGT1_235380 | 60   | 215.626                    | 0                               | AC5/TLAP3 (3)                                               |
| TGGT1_312050 | 61   | 214.619                    | 0                               | Putative small GTPase Rab2                                  |
| TGGT1_227000 | 62   | 207.888                    | 0                               | Localizes to the cytoplasm (14)                             |
| TGGT1_213350 | 63   | 204.126                    | 0                               | RPS15                                                       |
| TGGT1_244320 | 64   | 197.541                    | 0                               | PRPL24                                                      |

|              |     |         |        |                                                                  |
|--------------|-----|---------|--------|------------------------------------------------------------------|
| TGGT1_227360 | 65  | 196.78  | 92.531 | RPL34                                                            |
| TGGT1_212290 | 66  | 191.368 | 0      | RPLS19                                                           |
| TGGT1_226970 | 67  | 190.18  | 0      | RPS11                                                            |
| TGGT1_268200 | 68  | 189.006 | 83.321 | RNA recognition motif-containing protein                         |
| TGGT1_237880 | 69  | 186.701 | 0      | GRA13 (15)                                                       |
| TGGT1_224530 | 70  | 183.504 | 61.634 | IMC5 (5)                                                         |
| TGGT1_202550 | 71  | 174.209 | 0      | BCC6 (10)                                                        |
| TGGT1_291800 | 72  | 162.867 | 0      | ADP-ribosylation factor family protein                           |
| TGGT1_242070 | 73  | 159.059 | 0      | cAMP-dependent protein kinase regulatory subunit                 |
| TGGT1_273560 | 74  | 158.599 | 0      | Putative kinesin heavy chain                                     |
| TGGT1_219270 | 75  | 157.424 | 0      | GAPM2a (16)                                                      |
| TGGT1_202930 | 76  | 155.689 | 0      | ISC5 (7)                                                         |
| TGGT1_240630 | 77  | 153.095 | 0      | IMC35 (this study)                                               |
| TGGT1_229640 | 78  | 152.391 | 0      | AC8 (3)                                                          |
| TGGT1_214880 | 79  | 147.997 | 0      | AC4 (3)                                                          |
| TGGT1_224000 | 80  | 144.819 | 0      | IAP5 (this study)                                                |
| TGGT1_215470 | 81  | 141.101 | 0      | RPL10A                                                           |
| TGGT1_269960 | 82  | 135.482 | 0      | IMC40 (this study)                                               |
| TGGT1_220930 | 83  | 133.707 | 0      | ISC3 (3)                                                         |
| TGGT1_234380 | 84  | 129.376 | 0      | MIC21 (17)                                                       |
| TGGT1_250340 | 85  | 127.049 | 0      | Centrin 2 (18, 19)                                               |
| TGGT1_248360 | 86  | 123.963 | 0      | Hypothetical protein                                             |
| TGGT1_294670 | 87  | 110.538 | 0      | Translation initiation factor 3 subunit                          |
| TGGT1_206690 | 88  | 107.813 | 0      | GAPM2b (16)                                                      |
| TGGT1_228290 | 89  | 107.813 | 0      | Phospholipase/carboxylesterase                                   |
| TGGT1_266060 | 90  | 106.686 | 0      | Ribosomal protein RPSA                                           |
| TGGT1_266090 | 91  | 101.837 | 0      | Hypothetical protein                                             |
| TGGT1_202500 | 92  | 100.39  | 0      | GAPM1a (16)                                                      |
| TGGT1_232260 | 93  | 100.062 | 0      | TSC5 (7)                                                         |
| TGGT1_226960 | 94  | 99.98   | 44.075 | Phosphofructokinase PFKII                                        |
| TGGT1_313010 | 95  | 96.691  | 0      | DEAD (Asp-Glu-Ala-Asp) box polypeptide DDX6 (Ananvoranich, 2016) |
| TGGT1_248740 | 96  | 95.46   | 0      | Localizes to the subpellicular microtubules                      |
| TGGT1_201760 | 97  | 91.128  | 0      | TLAP4 (20)                                                       |
| TGGT1_297120 | 98  | 90.455  | 0      | Hypothetical protein                                             |
| TGGT1_226030 | 99  | 89.268  | 0      | AGC kinase (PKAc1) (21)                                          |
| TGGT1_285650 | 100 | 87.252  | 0      | Hypothetical protein                                             |
| TGGT1_311770 | 101 | 85.647  | 16.781 | BCC3 (10 & this study)                                           |
| TGGT1_310450 | 102 | 81.931  | 0      | IAP2 (this study)                                                |
| TGGT1_278850 | 103 | 81.433  | 0      | DHHC2 (22)                                                       |
| TGGT1_221630 | 104 | 79.862  | 0      | IAP4 (this study)                                                |
| TGGT1_267370 | 105 | 75.977  | 0      | Kinesin motor domain-containing protein (Kinesin A) (23)         |
| TGGT1_212250 | 106 | 68.807  | 0      | XPG N-terminal domain-containing protein                         |
| TGGT1_220900 | 107 | 65.054  | 0      | AC13 (this study)                                                |
| TGGT1_319850 | 108 | 62.744  | 0      | Splicing factor U2AF family SnRNP auxiliary factor large subunit |
| TGGT1_225690 | 109 | 62.234  | 0      | AC7 (3)                                                          |
| TGGT1_240060 | 110 | 61.982  | 0      | IST (24)                                                         |
| TGGT1_203010 | 111 | 60.873  | 0      | Aurora Kinase (25)                                               |
| TGGT1_222160 | 112 | 59.686  | 0      | Aldehyde dehydrogenase                                           |
| TGGT1_297870 | 113 | 55.004  | 0      | IMC36 (this study)                                               |
| TGGT1_225560 | 114 | 54.873  | 0      | IMC41 (this study)                                               |
| TGGT1_202220 | 115 | 53.343  | 0      | Hypothetical protein                                             |
| TGGT1_208030 | 116 | 52.791  | 0      | MIC4 (26)                                                        |
| TGGT1_266630 | 117 | 52.61   | 0      | CPH1 (14)                                                        |
| TGGT1_259940 | 118 | 49.148  | 0      | Hypothetical protein                                             |
| TGGT1_318440 | 119 | 47.971  | 0      | Helicase associated domain (ha2) protein                         |
| TGGT1_232150 | 120 | 45.928  | 0      | IMC32 (27)                                                       |
| TGGT1_249440 | 121 | 42.788  | 0      | AC12 (this study)                                                |
| TGGT1_312100 | 122 | 42.013  | 0      | IMC42 (this study)                                               |
| TGGT1_243960 | 123 | 38.418  | 0      | Nuclear transport factor 2 (nrf2) domain-containing protein      |
| TGGT1_315700 | 124 | 37.114  | 0      | Hypothetical protein                                             |
| TGGT1_310080 | 125 | 36.408  | 0      | AMP-binding enzyme domain-containing protein                     |
| TGGT1_257430 | 126 | 34.021  | 0      | Hypothetical protein                                             |
| TGGT1_309600 | 127 | 31.895  | 0      | Hypothetical protein                                             |
| TGGT1_294860 | 128 | 31.155  | 0      | BCC0 (10 & this study)                                           |
| TGGT1_209050 | 129 | 31.117  | 0      | TKL5 (28)                                                        |
| TGGT1_268870 | 130 | 29.698  | 0      | Tetratricopeptide repeat-containing protein                      |
| TGGT1_255190 | 131 | 26.148  | 0      | Myosin B and C (29)                                              |
| TGGT1_307580 | 132 | 26.036  | 0      | CBS domain-containing protein                                    |
| TGGT1_243430 | 133 | 22.497  | 0      | OTUD3C                                                           |

|              |     |        |   |                               |
|--------------|-----|--------|---|-------------------------------|
| TGGT1_298610 | 134 | 19.544 | 0 | GYF domain-containing protein |
| TGGT1_225960 | 135 | 19.345 | 0 | STE kinase                    |
| TGGT1_229260 | 136 | 17.699 | 0 | BCC4 (10)                     |
| TGGT1_223920 | 137 | 15.775 | 0 | RON3 (30)                     |
| TGGT1_231960 | 138 | 15.718 | 0 | GRA28 (31)                    |
| TGGT1_278440 | 139 | 14.56  | 0 | Nucleosome remodeling (32)    |

#### References for Table S2.

- Mann T, Beckers C. 2001. Characterization of the subpellicular network, a filamentous membrane skeletal component in the parasite *Toxoplasma gondii*. *Mol Biochem Parasitol* 115:257–268.
- Hu K, Johnson J, Florens L, Fraunholz M, Suravajjala S, DiLullo C, Yates J, Roos DS, Murray JM. 2006. Cytoskeletal Components of an Invasion Machine—The Apical Complex of *Toxoplasma gondii*. *PLOS Pathogens* 2:e13.
- Chen AL, Kim EW, Toh JY, Vashisht AA, Rashoff AQ, Van C, Huang AS, Moon AS, Bell HN, Bentolila LA, Wohlschlegel JA, Bradley PJ. 2015. Novel Components of the *Toxoplasma* Inner Membrane Complex Revealed by BioID. *mBio* 6.
- Lorestani A, Ivey FD, Thirugnanam S, Busby MA, Marth GT, Cheeseman IM, Gubbels M-J. 2012. Targeted proteomic dissection of *Toxoplasma* cytoskeleton sub-compartments using MORN1. *Cytoskeleton (Hoboken)* 69:1069–1085.
- Anderson-White BR, Ivey FD, Cheng K, Szatanek T, Lorestani A, Beckers CJ, Ferguson DJP, Sahoo N, Gubbels M-J. 2011. A family of intermediate filament-like proteins is sequentially assembled into the cytoskeleton of *Toxoplasma gondii*. *Cellular Microbiology* 13:18–31.
- Hu K, Johnson J, Florens L, Fraunholz M, Suravajjala S, DiLullo C, Yates J, Roos DS, Murray JM. 2006. Cytoskeletal Components of an Invasion Machine—The Apical Complex of *Toxoplasma gondii*. *PLOS Pathogens* 2:e13.
- Chen AL, Moon AS, Bell HN, Huang AS, Vashisht AA, Toh JY, Lin AH, Nadipuram SM, Kim EW, Choi CP, Wohlschlegel JA, Bradley PJ. 2017. Novel insights into the composition and function of the *Toxoplasma* IMC sutures. *Cellular Microbiology* 19:e12678.
- Beck JR, Rodriguez-Fernandez IA, de Leon JC, Huynh M-H, Carruthers VB, Morrisette NS, Bradley PJ. 2010. A novel family of *Toxoplasma* IMC proteins displays a hierarchical organization and functions in coordinating parasite division. *PLoS Pathog* 6:e1001094.
- Dos Santos Pacheco N, Tosetti N, Krishnan A, Haase R, Maco B, Suarez C, Ren B, Soldati-Favre D. 2021. Revisiting the Role of *Toxoplasma gondii* ERK7 in the Maintenance and Stability of the Apical Complex. *mBio* 12:e02057-21.
- Engelberg K, Bechtel T, Michaud C, Weerapana E, Gubbels M-J. 2022. Proteomic characterization of the *Toxoplasma gondii* cytokinesis machinery portrays an expanded hierarchy of its assembly and function. 1. *Nat Commun* 13:4644.
- Tosetti N, Dos Santos Pacheco N, Bertiaux E, Maco B, Bournonville L, Hamel V, Guichard P, Soldati-Favre D. 2020. Essential function of the alveolin network in the subpellicular microtubules and conoid assembly in *Toxoplasma gondii*. *eLife* 9:e56635.
- Frénal K, Marq J-B, Jacot D, Polonais V, Soldati-Favre D. 2014. Plasticity between MyoC- and MyoA-Glideosomes: An Example of Functional Compensation in *Toxoplasma gondii* Invasion. *PLOS Pathogens* 10:e1004504.
- Beck JR, Fung C, Straub KW, Coppens I, Vashisht AA, Wohlschlegel JA, Bradley PJ. 2013. A *Toxoplasma* Palmitoyl Acyl Transferase and the Palmitoylated Armadillo Repeat Protein TgARO Govern Apical Rhoptry Tethering and Reveal a Critical Role for the Rhoptries in Host Cell Invasion but Not Egress. *PLOS Pathogens* 9:e1003162.
- Long S, Anthony B, Drewry LL, Sibley LD. 2017. A conserved ankyrin repeat-containing protein regulates conoid stability, motility and cell invasion in *Toxoplasma gondii*. 1. *Nature Communications* 8:1–14.
- Nadipuram SM, Kim EW, Vashisht AA, Lin AH, Bell HN, Coppens I, Wohlschlegel JA, Bradley PJ. 2016. In Vivo Biotinylation of the *Toxoplasma* Parasitophorous Vacuole Reveals Novel Dense Granule Proteins Important for Parasite Growth and Pathogenesis. *mBio* 7.
- Harding CR, Egarter S, Gow M, Jiménez-Ruiz E, Ferguson DJP, Meissner M. 2016. Gliding Associated Proteins Play Essential Roles during the Formation of the Inner Membrane Complex of *Toxoplasma gondii*. *PLOS Pathogens* 12:e1005403.
- Tagoe DNA, Drozda AA, Falco JA, Bechtel TJ, Weerapana E, Gubbels M-J. 2021. Ferlins and TgDOC2 in *Toxoplasma* Microneme, Rhoptry and Dense Granule Secretion. 3. *Life* 11:217.
- Leung JM, Liu J, Wetzel LA, Hu K. 2019. Centrin2 from the human parasite *Toxoplasma gondii* is required for its invasion and intracellular replication. *Journal of Cell Science* 132:jcs228791.
- Lentini G, Dubois DJ, Maco B, Soldati-Favre D, Frénal K. 2019. The roles of Centrin 2 and Dynein Light Chain 8a in apical secretory organelles discharge of *Toxoplasma gondii*. *Traffic* 20:583–600.
- Liu J, He Y, Benmerzouga I, Sullivan WJ, Morrisette NS, Murray JM, Hu K. 2016. An ensemble of specifically targeted proteins stabilizes cortical microtubules in the human parasite *Toxoplasma gondii*. *MBoC* 27:549–571.
- Sugi T, Ma YF, Tomita T, Murakoshi F, Eaton MS, Yakubu R, Han B, Tu V, Kato K, Kawazu S-I, Gupta N, Suvorova ES, White MW, Kim K, Weiss LM. 2016. *Toxoplasma gondii* Cyclic AMP-Dependent Protein Kinase Subunit 3 Is Involved in the Switch from Tachyzoite to Bradyzoite Development. *mBio* <https://doi.org/10.1128/mBio.00755-16>.
- Frénal K, Tay CL, Mueller C, Bushell ES, Jia Y, Graindorge A, Billker O, Rayner JC, Soldati-Favre D. 2013. Global Analysis of Apicomplexan Protein S-Acyl Transferases Reveals an Enzyme Essential for Invasion. *Traffic* 14:895–911.
- Leung JM, He Y, Zhang F, Hwang Y-C, Nagayasu E, Liu J, Murray JM, Hu K. 2017. Stability and function of a putative microtubule-organizing center in the human parasite *Toxoplasma gondii*. *MBoC* 28:1361–1378.
- Olias P, Etheridge RD, Zhang Y, Holtzman MJ, Sibley LD. 2016. *Toxoplasma* Effector Recruits the Mi-2/NuRD Complex to Repress STAT1 Transcription and Block IFN- $\gamma$ -Dependent Gene Expression. *Cell Host & Microbe* 20:72–82.
- Berry L, Chen C-T, Reininger L, Carvalho TG, El Hajj H, Morlon-Guyot J, Bordat Y, Lebrun M, Gubbels M-J, Doerig C, Daher W. 2016. The conserved apicomplexan Aurora kinase TgArk3 is involved in endodyogeny, duplication rate and parasite virulence. *Cellular Microbiology* 18:1106–1120.
- Brecht S, Carruthers VB, Ferguson DJP, Giddings OK, Wang G, Jäkle U, Harper JM, Sibley LD, Soldati D. 2001. The *Toxoplasma* Micronemal Protein MIC4 Is an Adhesin Composed of Six Conserved Apple Domains \*. *Journal of Biological Chemistry* 276:4119–4127.
- Torres JA, Pasquarelli RR, Back PS, Moon AS, Bradley PJ. 2021. Identification and Molecular Dissection of IMC32, a Conserved *Toxoplasma* Inner Membrane Complex Protein That Is Essential for Parasite Replication. *mBio* 12.
- Varberg JM, Coppens I, Arrizabalaga G, Gaji RY. 2018. TgTKL1 Is a Unique Plant-Like Nuclear Kinase That Plays an Essential Role in Acute Toxoplasmosis. *mBio* 9:e00301-18.
- Delbac F, Sängler A, Neuhaus EM, Stratmann R, Ajioke JW, Toursel C, Herm-Götz A, Tomavo S, Soldati T, Soldati D. 2001. *Toxoplasma gondii* myosins B/C: one gene, two tails, two localizations, and a role in parasite division. *Journal of Cell Biology* 155:613–624.

30. Bradley PJ, Ward C, Cheng SJ, Alexander DL, Collier S, Coombs GH, Dunn JD, Ferguson DJ, Sanderson SJ, Wastling JM, Boothroyd JC. 2005. Proteomic Analysis of Rhoptry Organelles Reveals Many Novel Constituents for Host-Parasite Interactions in *Toxoplasma gondii*\*. *Journal of Biological Chemistry* 280:34245–34258.
31. Rudzki EN, Ander SE, Coombs RS, Alrubaye HS, Cabo LF, Blank ML, Gutiérrez-Melo N, Dubey JP, Coyne CB, Boyle JP. 2021. *Toxoplasma gondii* GRA28 Is Required for Placenta-Specific Induction of the Regulatory Chemokine CCL22 in Human and Mouse. *mBio* 12:e01591-21.
32. Syn G, Blackwell JM, Jamieson SE, Francis RW. 2018. An in silico pipeline to filter the *Toxoplasma gondii* proteome for proteins that could traffic to the host cell nucleus and influence host cell epigenetic regulation. *Mem Inst Oswaldo Cruz* 113.
