# Supplementary material for: IMC29 Plays an Important Role in Toxoplasma Endodyogeny and Reveals New Components of the Daughter-Enriched IMC Proteome
Source: PubMed Central journal article supplement (PMC9973257; doi:10.1128/mbio.03042-22), 2023-01-09
Supplement: mbio.03042-22-s0010.pdf [file mbio.03042-22-s0010.pdf]

Table S3: Oligonucleotides used in this study.

| Purpose                                        | Name | Description                    | Sequence 5'-3'                                                      |
|------------------------------------------------|------|--------------------------------|---------------------------------------------------------------------|
| IMC29 (TGGT1_243200) tagging                   | P1   | IMC29 gRNA-tagging sense       | AAGTTGCTCCGTTTCTGGTGTGTCTG                                          |
|                                                | P2   | IMC29 gRNA-tagging antisense   | AAAACAGACACACCAGAAACGGAGCA                                          |
|                                                | P3   | IMC29 HDR tagging template fwd | CTCACGCTCAGGCAGCAGTAGACCCCGGACACGGCCTCAATGGAAGTGGAGGACGGGAATTC      |
|                                                | P4   | IMC29 HDR tagging template rev | GTCACATCCGTATACACGGTTCTATGAGCAGATTCCGTCGACGGCCAGTGAATTGTAATA        |
| IMC29 (TGGT1_243200) knockout                  | P5   | IMC29 gRNA-KO sense            | AAGTTgTAAGGGTGCAAGAGTTGATGG                                         |
|                                                | P6   | IMC29 gRNA-KO antisense        | AAAACCATCAACTCTTGCACCCTTAcA                                         |
|                                                | P7   | IMC29 HDR KO template fwd      | GCTGAAGACTCCGCTGATCAAGCTCACGAAGGCAAAACACGGGAAGTGGAGGACGGGAATT       |
|                                                | P8   | IMC29 HDR KO template rev      | AGTCCACTGCTGCTCCTCGAGCAGTCTGGGAGATTTGGCGACGGCCAGTGAATTGTAATA        |
| IMC29 (TGGT1_243200) knockout regenerated      | P9   | IMC29 gRNA-KO sense new        | AAGTTGAACGATGAGCCGAGCAAGGG                                          |
|                                                | P10  | IMC29 gRNA-KO antisense new    | AAAACCTTGTCTCGGCTCATCGTTCA                                          |
|                                                | P11  | IMC29 HDR KO template fwd new  | GCCCAAGCAGAGCTGCTGCCGTTTGGTGGTCCAGGAATCCCACTCCATGGAACCTGACTG        |
|                                                | P12  | IMC29 HDR KO template rev new  | GATTCTGACCCACCAACGGCAGCAGCTCTGCTTGGGCCCTGCAAGTGCATAGAAGGAA          |
| AC9 (TGGT1_246950) tagging                     | P13  | AC9 gRNA-tagging sense         | AAGTTATGTGTTCTCAATGTCCAGG                                           |
|                                                | P14  | AC9 gRNA-tagging antisense     | AAAACCTGACATTTGAGGAACACATA                                          |
|                                                | P15  | AC9 HDR template fwd           | GCTGGAAGACTCCGCTGATCAAGCTAACGAAATATCCGAGGGAATGGGAAGTGGAGGACGGGAATTC |
|                                                | P16  | AC9 HDR template rev           | CTCGCAGCGTGTGCGACTGAACTCTTGTGCGGAGAGAGCGACGGCCAGTGAATTGTAATA        |
| FBXO1 (TGGT1_310930) tagging                   | P17  | FBXO1 gRNA-tagging sense       | AAGTTAGCCTTCTGGAGCACGGCAGG                                          |
|                                                | P18  | FBXO1 gRNA-tagging antisense   | AAAACCTGCCGTGCTCCAGAAGGCTA                                          |
|                                                | P19  | FBXO1 HDR template fwd         | CATAATCGATTACTACATGAGTCAGGGCGGAGCCAAATGCGGGAAGTGGAGGACGGGAATT       |
|                                                | P20  | FBXO1 HDR template rev         | GGTATCAGATCATCGAGAACAACGTTCCGATGCTGCTCCCGACGGCCAGTGAATTGTAATA       |
| IMC32 (TGGT1_232150) tagging                   | P21  | IMC32 gRNA-tagging sense       | AAGTTATGCTGTGGCGGGAAGTTG                                            |
|                                                | P22  | IMC32 gRNA-tagging antisense   | AAAACAACCTTCTCCGCCACAGCATA                                          |
|                                                | P23  | IMC32 HDR template fwd         | GCTGAAGACTCCGCTGATCAAGCTCACGAAGGCAAAACACGGGAAGTGGAGGACGGGAATT       |
|                                                | P24  | IMC32 HDR template rev         | AGTCCACTGCTGCTCCTCGAGCAGTCTGGGAGATTTGGCGACGGCCAGTGAATTGTAATA        |
| IMC29 full length cDNA                         | P25  | IMC29 full length fwd (BgIII)  | AGATCTATGGAAGCGTTGCCGTGCAAC                                         |
|                                                | P26  | IMC29 full length rev (NotI)   | gcgggcgcATTGAGGCCGTGTCGGG                                           |
| IMC29 endogenous promoter                      | P27  | IMC29 promoter fwd (NsiI)      | ATGCATCAC TACCACACCGTTTTATCAACT                                     |
|                                                | P28  | IMC29 promoter rev (BgIII)     | AGATCTTTTCGACAGGTCTTTCTGTTTAAAGT                                    |
| IMC29 deletion construct ( $\Delta$ 2-100)     | P29  | IMC29 2-100 fwd (BgIII)        | AGATCTATGGGCGAGCGGGGAAGGCTTTTC                                      |
| IMC29 deletion construct ( $\Delta$ 2-137)     | P30  | IMC29 2-137 fwd (BgIII)        | AGATCTATGGCTCTGGCCAAAGCGGCAG                                        |
| IMC29 deletion construct ( $\Delta$ 2-199)     | P31  | IMC29 2-199 fwd (BgIII)        | AGATCTatgGCCCCAAGCAAGCAGAGCTC                                       |
| IMC29 deletion construct ( $\Delta$ 2-389)     | P32  | IMC29 2-389 fwd (BgIII)        | AGATCTATGCTCCTCACGCTTGGCAAGAAAGC                                    |
| IMC29 deletion construct ( $\Delta$ 2-500)     | P33  | IMC29 2-500 fwd (BgIII)        | AGATCTATGGGTATTCCTATTCCACCGTTCT                                     |
| IMC29 deletion construct ( $\Delta$ 1111-1258) | P34  | IMC29 1111-1258 rev (NotI)     | gcgggcgcGACATCCTGGAAGGACGACA                                        |
| IMC29 deletion construct ( $\Delta$ 1218-1258) | P35  | IMC29 1218-1258 rev (NotI)     | gcgggcgcGCTCCGTACAGCCGCTTGA                                         |
| IMC29 deletion construct ( $\Delta$ 1111-1218) | P36  | IMC29 1111-1218 fwd (Q5)       | GAAACGCCAGGAAGAGCA                                                  |
|                                                | P37  | IMC29 1111-1218 rev (Q5)       | GACATCCTGGAAGGACGAC                                                 |
|                                                | P38  | 294610 gRNA-tagging sense      | AAGTTGGAGAGTTTTCGACAGTGTCTG                                         |
| TgGT1_294610 epitope tagging                   | P39  | 294610 gRNA-tagging antisense  | AAAACAAGCACTGTCCGAACTCTCCA                                          |
|                                                | P40  | 294610 HDR template fwd        | GCACTCTCAATACAAGATGGTCTTCCGACAGGGTCTCCAGGAAGTGGAGGACGGGAATT         |
|                                                | P41  | 294610 HDR template rev        | TACCTGTTGAGAATCCCTTCATCATAGGAAGATAGTGGCAGCGCCAGTGAATTGTAATA         |
| TgGT1_255450 epitope tagging                   | P42  | 255450 gRNA-tagging sense      | AAGTTgCTTGTCCACCTCTCAAACCTCG                                        |
|                                                | P43  | 255450 gRNA-tagging antisense  | AAAACGAGTTTGGAGGTTGGACAAGcA                                         |
|                                                | P44  | 255450 HDR template fwd        | CTTCTGGACGCAAAATGTGCAAGCACCTAGAGACTGCTCAGGGAAGTGGAGGACGGGAATT       |
| TgGT1_240630 epitope tagging                   | P45  | 255450 HDR template rev        | GGTTTAAACGAATGTGAGTTTCAGATGACTCGCAGAAGTGCAGCGCCAGTGAATTGTAATA       |
|                                                | P46  | 240630 gRNA-tagging sense      | AAGTTATGGCGTGGCAGGATAGCCGG                                          |
|                                                | P47  | 240630 gRNA-tagging antisense  | AAAACCGCTATCCTGCCACGCCATA                                           |
| TgGT1_294860 epitope tagging                   | P48  | 240630 HDR template fwd        | TGCACCGCCGAAGCCAAAGAGTTACCAGTATTAAGATGTGGAAGTGGAGGACGGGAATTC        |
|                                                | P49  | 240630 HDR template rev        | AATGTCTTGTCTGCCGACCGCAAACGACGCATCAGACCGACGGCCAGTGAATTGTAATA         |
|                                                | P50  | 294860 gRNA-tagging sense      | AAGTTGAGTGTGACGGGAGACGG                                             |
| TgGT1_311770 epitope tagging                   | P51  | 294860 gRNA-tagging antisense  | AAAACCGTCTCCCGCTAGCAGCTGCA                                          |
|                                                | P52  | 294860 HDR template fwd        | GGGGGGCGCAGGGAAGCTGGGGAGACAAGTACGCTTTTACGGAAGTGGAGGACGGGAATT        |
|                                                | P53  | 294860 HDR template rev        | CGCCGATACAATGACGGGACCCGAGACAGACGCGAGAACGACGGCCAGTGAATTGTAATA        |
| TgGT1_297870 epitope tagging                   | P54  | 311770 gRNA-tagging sense      | AAGTTGTTGTCTCAGTCCACTTTGG                                           |
|                                                | P55  | 311770 gRNA-tagging antisense  | AAAACCAAGAGTGGACTGAGACAACA                                          |
|                                                | P56  | 311770 HDR template fwd        | GGCAGATGGAAGACAGGTATAAATCCGCAAGAGGCCTCGGAAGTGGAGGACGGGAATT          |
| TgGT1_249440 epitope tagging                   | P57  | 311770 HDR template rev        | CTCCCCAGAGAAATTTCTACATACTCCTGTACAGACCCGACGGCCAGTGAATTGTAATA         |
|                                                | P58  | 297870 gRNA-tagging sense      | TTCCGTGGCGACGACACAAGAGAGCTTACTCCGTCAACGGAAGTGGAGGACGGGAATT          |
|                                                | P59  | 297870 gRNA-tagging antisense  | TACAAAGAAAATCACAATTCGACTGACTCAGCTTCCGTCGACGGCCAGTGAATTGTAATA        |
| TgGT1_220900 epitope tagging                   | P60  | 297870 HDR template fwd        | AAGTTgCAACAAGAGCCACTGCACGGG                                         |
|                                                | P61  | 297870 HDR template rev        | AAAACCGTGCAGTGGCTCTTGTGcA                                           |
|                                                | P62  | 249440 gRNA-tagging sense      | AAGTTGCAAGTGGAAACATGAGTCGCAG                                        |
| TgGT1_310450 epitope tagging                   | P63  | 249440 gRNA-tagging antisense  | AAAACGCGACTCATGTTCCACTGCA                                           |
|                                                | P64  | 249440 HDR template fwd        | TGGTGGAGGAATTTCCGCGCTGAACCTCAATTTTACTCGGAAGTGGAGGACGGGAATT          |
|                                                | P65  | 249440 HDR template rev        | CAGACGGACTTGGTAAAGCAACCATCACAACTGCTCCGACGGCCAGTGAATTGTAATA          |
| TgGT1_220900 epitope tagging                   | P66  | 220900 gRNA-tagging sense      | AAGTTGGGTAGACTGATGCTTCCAG                                           |
|                                                | P67  | 220900 gRNA-tagging antisense  | AAAACGGAAGCATCAGATCTACCCA                                           |
|                                                | P68  | 220900 HDR template fwd        | TGCGCCACAGAGTACTCCCTTGAATTTGAAAGCATTCCGGAAGTGGAGGACGGGAATT          |
| TgGT1_310450 epitope tagging                   | P69  | 220900 HDR template rev        | CCTGAGGTGTACAGCACAGGGCCACTGCTCAGACACCGACGGCCAGTGAATTGTAATA          |
|                                                | P70  | 310450 gRNA-tagging sense      | AAGTTgTCTGTGAACATGCTAGTTCGG                                         |
|                                                | P71  | 310450 gRNA-tagging antisense  | AAAACCGAAGTGCATGTTCCACAGAcA                                         |
| TgGT1_310450 epitope tagging                   | P72  | 310450 HDR template fwd        | GCGCTCGGAGTTTCACTGTCACACCAAGGTGTTCCGTTGGGGAAGTGGAGGACGGGAATT        |
|                                                | P73  | 310450 HDR template rev        | GAAGATTGTGCATTTCCATATCTCCAGCAAAGACTCTGCGACGGCCAGTGAATTGTAATA        |
|                                                | P74  | 238170 gRNA-tagging sense      | AAGTTATATGATGACGAAGGGATGTG                                          |

|                              |      |                               |                                                              |
|------------------------------|------|-------------------------------|--------------------------------------------------------------|
| TgGT1_238170 epitope tagging | P75  | 238170 gRNA-tagging antisense | AAAACACATCCCTTCGTCATCATATA                                   |
|                              | P76  | 238170 HDR template fwd       | CACGAAATCGCGTCTCTTCTCGCTTTACACGACCTTCTTGGAAAGTGGAGGACGGGAATT |
|                              | P77  | 238170 HDR template rev       | ATACAAATCGACAAGAAATCACAAATCGAGACAGATCCCGACGGCCAGTGAATTGTAATA |
| TgGT1_221630 epitope tagging | P78  | 221630 gRNA-tagging sense     | AAGTTACAACGTTTCTCACTTCGTTCCG                                 |
|                              | P79  | 221630 gRNA-tagging antisense | AAAACGAACGAAGTGAAGCGTTGTA                                    |
|                              | P80  | 221630 HDR template fwd       | TGGACCCAGCAATCGTGCTGTGACAGTGACGGATCTTCTGGAAGTGGAGGACGGGAATT  |
| TgGT1_224000 epitope tagging | P81  | 221630 HDR template rev       | CCGTACGAGACAACACCACAACGACCCTCGAAGCAGTCCGACGGCCAGTGAATTGTAATA |
|                              | P82  | 224000 gRNA-tagging sense     | AAGTTGAGCAACAAGATGCGCAAACG                                   |
|                              | P83  | 224000 gRNA-tagging antisense | AAAACGTTTGCGCATCTTGTGCTCA                                    |
| TgGT1_235690 epitope tagging | P84  | 224000 HDR template fwd       | AACTGGCGGCGAGGGGCTGACATAAAAGGACTCGTCTTGGAAAGTGGAGGACGGGAATT  |
|                              | P85  | 224000 HDR template rev       | TACTCCTGAGTGAATCAAGAAAACCTTTCACCTTCTGCCGACGGCCAGTGAATTGTAATA |
|                              | P86  | 235690 gRNA-tagging sense     | AAGTTGTAAGACTACCCTTGCCTGAG                                   |
| TgGT1_235690 epitope tagging | P87  | 235690 gRNA-tagging antisense | AAAACGTTTGCGCATCTTGTGCTCA                                    |
|                              | P88  | 235690 HDR template fwd       | ACACAAGGCTCGCTCTCATAAGAGGAAATTGATTTGTTGCGGAAGTGGAGGACGGGAATT |
|                              | P89  | 235690 HDR template rev       | ACTCTAGAGCGTGGCAGAAATGTGCTCTTCTGGACCGACGGCCAGTGAATTGTAATA    |
| TgGT1_293360 epitope tagging | P90  | 293360 gRNA-tagging sense     | AAGTTGGACTTCTAGGGATTGTTGGG                                   |
|                              | P91  | 293360 gRNA-tagging antisense | AAAACGTTTGCGCATCTTGTGCTCA                                    |
|                              | P92  | 293360 HDR template fwd       | GTTTCGCAGCATGCTCCGGCCGTACAGATCGATCTATTCCGGAAGTGGAGGACGGGAATT |
| TgGT1_255420 epitope tagging | P93  | 293360 HDR template rev       | TGACATGGACAAAACGCTGACATTCCGTGAGGCAATCCGACGGCCAGTGAATTGTAATA  |
|                              | P94  | 255420 gRNA-tagging sense     | AAGTTGGTTCTCTATCCAGTGACGG                                    |
|                              | P95  | 255420 gRNA-tagging antisense | AAAACGTTTGCGCATCTTGTGCTCA                                    |
| TgGT1_255420 epitope tagging | P96  | 255420 HDR template fwd       | AGGAGAAGGGGCTGCGGAATTGCTGGAGTCTCTTAATGCAGGAAGTGGAGGACGGGAATT |
|                              | P97  | 255420 HDR template rev       | AAGAAGATTCTGCTGCGAACGTGTGCGGTCGATCTTCCCGACGGCCAGTGAATTGTAATA |
|                              | P98  | 269960 gRNA-tagging sense     | AAGTTgATCCCCGTTTCTGCGCTTCGG                                  |
| TgGT1_269960 epitope tagging | P99  | 269960 gRNA-tagging antisense | AAAACGTTTGCGCATCTTGTGCTCA                                    |
|                              | P100 | 269960 HDR template fwd       | TGGACAATCTCTCGACGCAGGGAGCACCGCTTCTTTCGCCGGAAGTGGAGGACGGGAATT |
|                              | P101 | 269960 HDR template rev       | TCCGCTCTCTGCTCTTTGCCCGGTGGCGGTTCTTTCGACGGCCAGTGAATTGTAATA    |
| TgGT1_225560 epitope tagging | P102 | 225560 gRNA-tagging sense     | AAGTTGAAGTGTCTTTCGACGAATAG                                   |
|                              | P103 | 225560 gRNA-tagging antisense | AAAACGTTTGCGCATCTTGTGCTCA                                    |
|                              | P104 | 225560 HDR template fwd       | GTCCACTCGTGAGGAGAACAATAAACGACTTTTTTACGATGGAAGTGGAGGACGGGAATT |
| TgGT1_312100 epitope tagging | P105 | 225560 HDR template rev       | GACACCACATTTCAAAAGTGGCATCGAATGATCAGGGCGACGGCCAGTGAATTGTAATA  |
|                              | P106 | 312100 gRNA-tagging sense     | AAGTTGCACACGAAAGAAACGCTG                                     |
|                              | P107 | 312100 gRNA-tagging antisense | AAAACGTTTGCGCATCTTGTGCTCA                                    |
| TgGT1_312100 epitope tagging | P108 | 312100 HDR template fwd       | ACTCAGTGACGCCAGGGAGGAGGCATGCATAGAAATGCAAGGAAGTGGAGGACGGGAATT |
|                              | P109 | 312100 HDR template rev       | GCGCCCTGTTCTCAAAACTTCTCCGTTCCCTTGTGCGCAGGGCCAGTGAATTGTAATA   |
|                              | P110 | 311230 gRNA-tagging sense     | AAGTTgTTTGTAGTGGCGGCAACATG                                   |
| TgGT1_311230 epitope tagging | P111 | 311230 gRNA-tagging antisense | AAAACATGTTCCGCCACTACAAAcA                                    |
|                              | P112 | 311230 HDR template fwd       | GCAGCCTCGTGTTCGCCCGGAAGAAGAGGGCTGCGAGGGAAGTGGAGGACGGGAATT    |
|                              | P113 | 311230 HDR template rev       | CACGGTTTATCTCGAAGTTGACGATGGGGCAGAACCACCGACGGCCAGTGAATTGTAATA |
| TgGT1_202550 epitope tagging | P114 | 202550 gRNA-tagging sense     | AAGTTgAAAGTCGCTCGCGACCCATGG                                  |
|                              | P115 | 202550 gRNA-tagging antisense | AAAACCATGGGTCGCGAGCGACTTcA                                   |
|                              | P116 | 202550 HDR template fwd       | GCGGTGGGAGGAAGTAAAGGCAAGGACGCACAAAGGCGCGGAAGTGGAGGACGGGAATT  |
| TgGT1_229260 epitope tagging | P117 | 202550 HDR template rev       | TCCGAGACATGGGACTCATCGTCTCCAAAACAAACGCGCAGGGCCAGTGAATTGTAATA  |
|                              | P118 | 229260 gRNA-tagging sense     | AAGTTGCGCGGCAACGACGCTGTG                                     |
|                              | P119 | 229260 gRNA-tagging antisense | AAAACACAGCGTCCGTTGGCCGCGCA                                   |
| TgGT1_229260 epitope tagging | P120 | 229260 HDR template fwd       | CTACAGAAACGGCGTTCTGCTCTCTTGCAAATGAAATCGGAAGTGGAGGACGGGAATT   |
|                              | P121 | 229260 HDR template rev       | TCTACAGAAGAGAGACCCTTGGTCTGTCTATACACCAGCGACGGCCAGTGAATTGTAATA |
